# Supplementary material
Source: Elsevier journal article supplement (https://www.sciencedirect.com/science/article/pii/S0210570521001473)
Supplement: mmc1 [file S0210570521001473:mmc1.doc]

**Anexo 1**

Cuestionario de Rawl para cribado de cáncer colorectal con sangre oculta en heces

(fichero PDF)

**Tabla 1**

Consistencia interna del cuestionario de Rawl para el cribado con

sangre oculta en heces

|  | **Media**  **(si se suprime ítem)** | **Varianza**  **(si se suprime ítem)** | **Correlación total de ítem (corregida)** | **Alfa de Cronbach**  **(si se suprime ítem)** |
| --- | --- | --- | --- | --- |
| 1. Le ayudará a detectar el cáncer de colon precozmente | 16.03 | 24.52 | 0.274 | 0.795 |
| 1. Le ayudará a disminuir la probabilidad de morir por cáncer de colon | 15.92 | 24.12 | 0.327 | 0.791 |
| 1. Le ayudará a no preocuparse tanto por el CCR | 15.76 | 24.35 | 0.251 | 0.798 |
| 1. Le preocupa poder encontrar algo mal | 15.65 | 22.04 | 0.407 | 0.787 |
| 1. La prueba le da vergüenza | 15.98 | 22.96 | 0.534 | 0.774 |
| 1. No tiene tiempo para hacerla | 15.83 | 22.99 | 0.443 | 0.781 |
| 1. No sabe cómo hacerla | 15.82 | 22.14 | 0.530 | 0.772 |
| 1. Recoger una muestra de heces es desagradable | 15.69 | 21.87 | 0.512 | 0.774 |
| 1. La prueba es cara | 16.08 | 24.06 | 0.479 | 0.781 |
| 1. No tiene síntomas o problemas intestinales | 15.54 | 20.59 | 0.549 | 0.770 |
| 1. No tiene intimidad para hacerla en casa | 16.04 | 23.47 | 0.516 | 0.777 |
| 1. No es un problema importante en el momento actual | 15.71 | 21.43 | 0.526 | 0.772 |

Valores medios y varianza de la escala si la pregunta es eliminada, índice de homogeneidad corregido (correlación total de elementos corregida). Alpha de Cronbach si se elimina el ítem

**Tabla 2**

Validez del cuestionario Rawl para el cribado de cáncer colorectal:

análisis factorial exploratorio y confirmatorio

|  | **Dimensión 1: Beneficios del cribado** | **Dimensión 2: Barreras del cribado** |
| --- | --- | --- |
| 1. Le ayudará a detectar el cáncer de colon precozmente | 0.879 |  |
| 1. Le ayudará a disminuir la probabilidad de morir por cáncer de colon | 0.908 |  |
| 1. Le ayudará a no preocuparse tanto por el cáncer de colon | 0.868 |  |
| 1. Le preocupa poder encontrar algo mal |  | 0.561 |
| 1. La prueba le da vergüenza |  | 0.663 |
| 1. No tiene tiempo para hacerla |  | 0.661 |
| 1. No sabe cómo hacerla |  | 0.714 |
| 1. Recoger una muestra de heces es desagradable |  | 0.646 |
| 1. La prueba es cara |  | 0.642 |
| 1. No tiene síntomas o problemas intestinales |  | 0.651 |
| 1. No tiene intimidad para hacerla en casa |  | 0.675 |
| 1. No es un problema importante en el momento actual |  | 0.664 |
| Autovalores iniciales | 2.33 | 3.94 |
| Varianza total explicada por cada factor | 19,43% | 32,82% |
| Varianza total explicada | 52.25% | |

Factores identificados, autovalores, variabilidad total explicada
